# Supplementary material for: Smooth muscle SIRT1 reprograms endothelial cells to suppress angiogenesis after ischemia
Source: PubMed Central journal article supplement (PMC6956806; doi:10.7150/thno.39320), 2020-01-01
Supplement: thnov10p1197s1.pdf [file thnov10p1197s1.pdf]

## Supplementary Materials:

**Supplemental Table 1.** PCR primer sequence, siRNA sequence, FISH probe sequence and primers applied in PCR genotyping on mouse genomic DNA

| Primer sequence  |         |                          |
|------------------|---------|--------------------------|
| Mouse PDGFB      | Forward | ATGAAATGCTGAGCGACCACT    |
|                  | Reverse | TCAGCCCCATCTTCATCTACGG   |
| Mouse VEGFA      | Forward | TATGGCTGGCTGGGTCACTA     |
|                  | Reverse | GCTTTGTTCTGTCTTTCTTTGGTC |
| Mouse TUBULIN    | Forward | ACAATGCCACCCTTTCAGTCCA   |
|                  | Reverse | CACTAGATGGTTCAGGTCACCGTA |
| Mouse ZFP609     | Forward | TCTCCAGGTTATGCACAGTCCA   |
|                  | Reverse | TCTTTACTTTCCCTTCTACGCTCT |
| Mouse cZFP609    | Forward | GGCCACTAAAGAAAGTCAAGTCTG |
|                  | Reverse | GGACATCTTAGAGTCAACGTCCC  |
| Mouse circFoxo3  | Forward | ACGGGTTGGATTTTAACTTTGACT |
|                  | Reverse | TCATTCTGAACGCGCATGAAGC   |
| Mouse circZFP292 | Forward | TGCTCTCCACTATCCTTTCC     |
|                  | Reverse | CTCCAGCAAAGGTAAAGGGTC    |
| Mouse circTHSD1  | Forward | GCTGAAAACAGACTGCCCT      |
|                  | Reverse | CCGTTCTGTCGCTCAGTGCC     |
| Mouse circITCH   | Forward | AGACCCCAAGCAAGGTC        |
|                  | Reverse | TCCTCTGATCCATTTGTGCTC    |
| Mouse CD31       | Forward | AGCTAGCAAGAAGCAGGAAGGACA |
|                  | Reverse | TAAGGTGGCGATGACCACTCCAAT |
| Mouse QKI        | Forward | AACAACCTGAAGCAGAAACGGGAT |
|                  | Reverse | TTCACTTCTTCAACCGCTCT     |
| Human cZNF609    | Forward | CCTCCAGCCAGTTCCCTTG      |
|                  | Reverse | GTTCTCAGACCTGCCACATTG    |
| Human GAPDH      | Forward | ATCTTCCAGGAGCGAGATCCC    |
|                  | Reverse | TGAGTCCTTCCACGATACCAA    |
| siRNA sequence   |         |                          |
| Scrambled siRNA  | Forward | UUCUCCGAACGUGUCACGUTT    |
|                  | Reverse | ACGUGACACGUUCGGAGAATT    |
| circZFP609 siRNA | Forward | GUCUGAAAAGCAAUGAUGUTT    |
|                  | Reverse | ACAUCAUUGCUUUUCAGACTT    |

|                                                        |           |                                              |
|--------------------------------------------------------|-----------|----------------------------------------------|
| QKI siRNA                                              | Forward   | GAGAAUCCUUGGACCUAGATT                        |
|                                                        | Reverse   | UCUAGGUCCAAGGAUUCUCTT                        |
| <hr/>                                                  |           |                                              |
| RNA pull down probe (biotin)                           |           |                                              |
| Oligo                                                  |           | AAGAAAGTCAAGTCTGAAAAGCAA<br>TGATGTTGTCCACTGG |
| Mouse cZFP609                                          |           | CCAGTGGACAACATCATTGCTTTTC<br>AGACTTGACTTTCTT |
| Oligo                                                  |           | ACGCAATTACATCATTCGGT                         |
| ZFP609 pre-mRNA1                                       |           | AACAATACAGGCAAGGAGAT                         |
| ZFP609 pre-mRNA2                                       |           | TTAACTTCTCCTACCACTGC                         |
| ZFP609 pre-mRNA3                                       |           | GTAGCCACCAATAGAATCCT                         |
| ZFP609 pre-mRNA4                                       |           | CATCTAGCAACAAGTGTCTT                         |
| <hr/>                                                  |           |                                              |
| Fish probe                                             |           |                                              |
| Mouse cZFP609-Cy3                                      |           | CCAGTGGACAACATCATTGCTTTTC<br>AGACTTGACTTTCTT |
| <hr/>                                                  |           |                                              |
| Chip primer                                            |           |                                              |
| Amplified site on genome                               |           |                                              |
| Mouse pdgfb intron<br>9708~9746                        | Forward   | CAGCCCTACCCATGCCCAA                          |
|                                                        | Reverse   | AACAGGGCTCCAGGGACCA                          |
| Mouse vegfa promoter<br>-933~-888                      | Forward   | CACCCTGGCTTCAGTTCCC                          |
|                                                        | Reverse   | TGAGCCCTTGTCTGATCTGC                         |
| <hr/>                                                  |           |                                              |
| QKI RIP qPCR                                           |           |                                              |
| zfp609 Intron 1-1                                      | Forward   | AGTGGTTTTCCAATGGTAAAACATG                    |
|                                                        | Reverse   | CCCCAAGTCATAACGTATCACCT                      |
| zfp 609 Intron 1-2                                     | Forward   | TGATTCAGACAGGAGTACCAGC                       |
|                                                        | Reverse   | ATGTCACACTGGACCTCGAGA                        |
| zfp 609 Intron 2-3                                     | Forward   | CACTGCCCATCAGAACTGCC                         |
|                                                        | Reverse   | ATTACCAGCTGCTCTGACCTTG                       |
| zfp 609 Intron 2-4                                     | Forward   | TAACTTTGACATAAGCTTTGCCTC                     |
|                                                        | Reverse   | TAGTAAGTTCTAGGCAATCCAGG                      |
| <hr/>                                                  |           |                                              |
| Primers applied in PCR genotyping on mouse genomic DNA |           |                                              |
| Gene                                                   |           |                                              |
| Human SIRT1                                            | P1:       | CTTCAGGTCAAGGGATGGTAT                        |
|                                                        | P2:       | GCGTGTCTATGTTCTGGGTAT                        |
| Sirt1-LoxP                                             | oIMR7909: | GGTTGACTTAGGTCTTGTCTG                        |
|                                                        | oIMR7912: | CGTCCCTTGTAATGTTTCCC                         |

SM22a-Cre

---

oIMR7055: GGCCCAGGGGTTGTCAAATAGTC

oIMR7056: CTCCTCCAGCTCCTCGTCATACTTC

oIMR7057: CGCCGCATAACCAGTGAAACAG

---

**Supplemental Table 2 Comparison of baseline characteristics of patients with lower extremity PAD or control subjects**

|                                               | ABI<0.8<br>n=19 | ABI>0.9<br>n=30 | <i>P</i>  |
|-----------------------------------------------|-----------------|-----------------|-----------|
| Age (years), (mean ±SD)                       | 63.17±7.49      | 63.89±9.89      | 0.771     |
| Gender (male), n (%)                          | 13(68.42)       | 16(53.33%)      | 0.295     |
| Intermittent claudication or rest pain, n (%) | 19(100)         | 0(0)            | P<0.001** |
| The extremities with ulceration, n (%)        | 4(21.05)        | 0(0)            | 0.037*    |
| The extremities with gangrene, n (%)          | 2(10.53)        | 0(0)            | 0.145     |
| Current smoking, n (%)                        | 7(36.84)        | 12(40.00)       | 0.825     |
| Former smoker, n (%)                          | 12(63.16)       | 16(53.33)       | 0.498     |
| SBP (mmHg), (mean ±SD)                        | 135.13±17.51    | 142.21±23.25    | 0.231     |
| DBP (mmHg), (mean ±SD)                        | 81.27±11.33     | 77.95±11.36     | 0.323     |
| Hypertension, n (%)                           | 16(84.21)       | 21(70.00)       | 0.432     |
| Diabetes, n (%)                               | 6(31.58)        | 10(33.33)       | 0.898     |
| Hyperlipidaemia, n (%)                        | 2(10.53)        | 4(13.33)        | 1.000     |
| Prior stroke,                                 | 5(26.32)        | 9(30.00)        | 0.781     |
| Chronic kidney disease                        | 1(5.26)         | 2(6.67)         | 1.000     |
| Carotid artery disease                        | 3(15.79)        | 5(16.67)        | 1.000     |
| Coronary heart disease                        | 7(36.84)        | 11(36.67)       | 0.990     |
| Heart failure                                 | 1(5.26)         | 2(6.67)         | 1.000     |

ABI, ankle-brachial index; PAD, peripheral artery disease

## Supplemental Figure 1

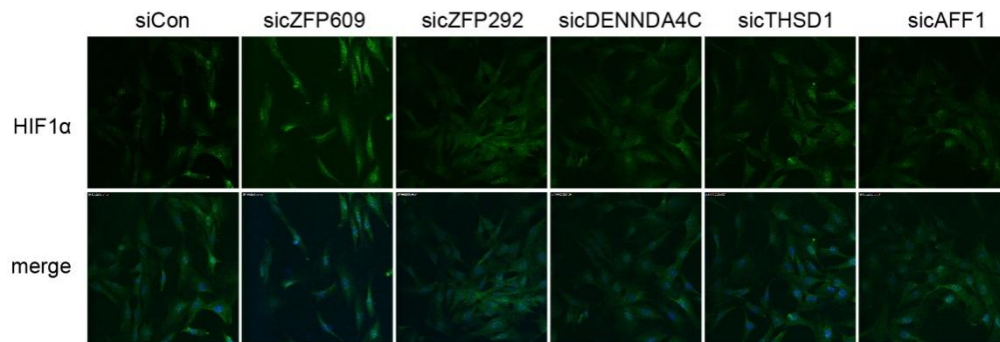

**Figure S1** HIF1 $\alpha$  nuclear translocation induced by hypoxia in ECs. ECs were treated with the exosomes from *SIRT1*-Tg VSMCs knocked down for these circRNAs under hypoxia.
